# Supplementary material for: Epigenetic and Transcriptional Modifications in Repetitive Elements in Petrol Station Workers Exposed to Benzene and MTBE
Source: MDPI journal article supplement (doi:10.3390/ijerph15040735), 2018-04-12
Supplement: s1 [file s1]

**Supplementary Table S1.** Summary of health status, including work-related symptoms, present and previous diseases, drug assumption, blood cell count, liver enzymes, triglycerides, cholesterol and C-reactive protein (CRP) in petrol station workers and control subjects. Only reported symptoms/diseases/drugs are included.

|                                            | Statistics                      | Petrol station workers (N = 89) | Controls (N=90)  | P-value |
|--------------------------------------------|---------------------------------|---------------------------------|------------------|---------|
| <b>Work-related symptoms</b>               | Yes N (%)                       | 18 (20.2)                       | 12 (13.3)        | 0.217   |
| Headache                                   | N (%)                           | 5 (5.6)                         | 4 (4.4)          | 0.719   |
| Throat irritation                          | N (%)                           | 4 (4.5)                         | 4 (4.4)          | 0.987   |
| Eye irritation                             | N (%)                           | 9 (10.1)                        | 4 (4.4)          | 0.144   |
| Cough                                      | N (%)                           | 6 (6.7)                         | 3 (3.3)          | 0.297   |
| Skin irritation                            | N (%)                           | 3 (3.4)                         | 3 (3.3)          | 0.989   |
| <b>Diseases (last 30 days)</b>             | Yes N (%)                       | 5 (5.5)                         | 5 (5.6)          | 0.985   |
| Cold                                       | N (%)                           | 4 (4.5)                         | 2 (2.2)          | 0.398   |
| Hepatitis                                  | N (%)                           | 1 (1.1)                         | 0                | 0.313   |
| Herpes simplex                             | N (%)                           | 0                               | 3 (3.3)          | 0.082   |
| <b>Previous diseases (last six months)</b> | Yes N (%)                       | 28 (31.4)                       | 19 (21.1)        | 0.116   |
| Cold                                       | N (%)                           | 24 (26.9)                       | 16 (17.8)        | 0.140   |
| Hepatitis                                  | N (%)                           | 1 (1.1)                         | 1                | 0.994   |
| Herpes simplex                             | N (%)                           | 4 (4.5)                         | 7 (7.8)          | 0.360   |
| <b>Drugs (present)</b>                     | Yes N (%)                       | 4 (4.5)                         | 3 (3.3)          | 0.987   |
| Oral antidiabetics                         | N (%)                           | 3 (3.4)                         | 2 (2.2)          | 0.641   |
| Penicillin                                 | N (%)                           | 0                               | 1 (1.1)          | 0.319   |
| Glucocorticoids                            | N (%)                           | 1 (1.1)                         | 0                | 0.313   |
| Heparin                                    | N (%)                           | 0                               | 1 (1.1)          | 0.319   |
| <b>Previous drugs (last 30 days)</b>       | Yes N (%)                       | 12 (13.5)                       | 4 (4.4)          | 0.034   |
| Oral antidiabetics                         | N (%)                           | 2 (2.2)                         | 1 (1.1)          | 0.554   |
| Penicillin                                 | N (%)                           | 1 (1.1)                         | 2 (2.2)          | 0.567   |
| Glucocorticoids                            | N (%)                           | 3 (3.3)                         | 1 (1.1)          | 0.306   |
| heparin                                    | N (%)                           | 1 (1.1)                         | 0                | 0.313   |
| UV radiation                               | N (%)                           | 4 (4.5)                         | 0                | 0.042   |
| <b>Blood test</b>                          |                                 |                                 |                  |         |
| White cells (N/L)                          | mean $\pm$ SD                   | 7.64 $\pm$ 1.84                 | 7.01 $\pm$ 1.75  | 0.0198  |
| Red cells (N/L)                            | mean $\pm$ SD                   | 5.09 $\pm$ 0.41                 | 4.98 $\pm$ 0.36  | 0.0428  |
| Hemoglobin (g/dL)                          | mean $\pm$ SD                   | 15.0 $\pm$ 1.1                  | 14.9 $\pm$ 1.1   | 0.5552  |
| Hematocrit (%)                             | mean $\pm$ SD                   | 43.9 $\pm$ 2.9                  | 43.3 $\pm$ 2.6   | 0.1758  |
| MCV (fL)                                   | mean $\pm$ SD                   | 86.0 $\pm$ 5.7                  | 86.9 $\pm$ 5.7   | 0.3103  |
| Platelet (N/L)                             | mean $\pm$ SD                   | 224.1 $\pm$ 56.1                | 220.6 $\pm$ 54.0 | 0.6742  |
| AST (IU/L)                                 | median (10th-90th)              | 24 (19-39)                      | 25 (19-39)       | 0.766   |
| ALT(IU/L)                                  | median (10th-90th)              | 26 (15-47)                      | 26 (16-63)       | 0.3028  |
| GGT (IU/L)                                 | median (10th-90th)              | 24 (15-63)                      | 24 (14.5-55)     | 0.4731  |
| Triglycerides (mg/dL)                      | median (10th-90th)              | 130 (74-301)                    | 113 (61-273 )    | 0.0172  |
| Cholesterol (mg/dL)                        | mean $\pm$ SD                   | 194 $\pm$ 39                    | 188 $\pm$ 39     | 0.3313  |
| HDL cholesterol (mg/dL)                    | mean $\pm$ SD                   | 48 $\pm$ 13                     | 49 $\pm$ 12      | 0.9133  |
| LDL cholesterol (mg/dL)                    | mean $\pm$ SD                   | 114 $\pm$ 35                    | 113 $\pm$ 34     | 0.8239  |
| CRP (mg/L)                                 | median (10th-90 <sup>th</sup> ) | 0.12 (0.03-0.52)                | 0.12 (0.03-0.34) | 0.5631  |
