# Supplementary material for: Epigenetic and Transcriptional Modifications in Repetitive Elements in Petrol Station Workers Exposed to Benzene and MTBE
Source: MDPI journal article supplement (doi:10.3390/ijerph15040735), 2018-04-12
Supplement: s1 [file s1]

**Supplementary Figure S1.** Primers for gene expression real-time PCR, and methylation, including PCR conditions.

| Gene expression eal-time PCR primers |                  |                           |                           |
|--------------------------------------|------------------|---------------------------|---------------------------|
| Family                               | qPCR Target RNAs | Forward primer (5' to 3') | Reverse primer (5' to 3') |
| Alu                                  | <i>AluY</i>      | CAAGGTGAAACCCGTCTCTAC     | CCATTCTCCTGCCTCAGCC       |
|                                      | <i>AluJ</i>      | CATAGCGAGACCCGTCTCTAC     | CGATCCTCCTGCCTCAGC        |
| LINE-1                               | L1 5'UTR         | CTCAAGTGGGTCCCTGACTCC     | TCTGTTGGAATACCCTGCCG      |
|                                      | L1 ORF1          | GGACATTCAAACCAAAGGCAA     | ATCAGCTCCTTTAAGCACTTCTCTG |
| Housekeeping gene                    | B2M              | GGCTATCCAGCGTACTCCAAAG    | TGGATGAAACCCAGACACATAGC   |

| Methylation primers |               |                                    |                                          |                              |                            |
|---------------------|---------------|------------------------------------|------------------------------------------|------------------------------|----------------------------|
| Family              | Assay         | Forward Primer (5' to 3')          | Reverse Primer (5' to 3')                | Sequencing Primer (5' to 3') | Annealing temperature (°C) |
| <i>Alu</i>          | <b>AluYb8</b> | Biotin-AGATTATTTTGGTTAATAAG        | AACTACYAACTACAATAAC                      | AATAACTAAAACCTACAAAC         | 53.9                       |
|                     | <b>AluSx</b>  | Biotin-<br>TTTTTATTAAAAATATAAAAATT | CCCAAACATAAAATACAATAA                    | AATAACTAAAATTACAAAC          | 50.0                       |
| LINE-1              | <b>L1Pa5</b>  | TTAGTTAAGGGAAGAGGGGATAAA           | Biotin-<br>ATAAACATAAAACCCCTCTAAACCAAACA | TTAGTTAAGGGAAGA              | 40.0                       |
|                     | <b>L1Pa2</b>  | TTAGATAGTGGGYGTAGGTTAGTGGG<br>T    | Biotin-CCTCCRAACCAAATAT<br>AAAATATAATCT  | GAGTTAAAGAAAGGG              | 55.0                       |
|                     | <b>L1Hs</b>   | TTTTGAGTTAGGTGTGGGATATA            | Biotin-AAAATCAAAAAATTCCCTTTC             | AGTTAGGTGTGGGATA<br>TAGT     | 56.3                       |
